# Supplementary material
Source: PubMed Central journal article supplement (PMC3761430)
Supplement: Supp_Fig1.pdf [file Supp_Fig1.pdf]

## Supplementary Data

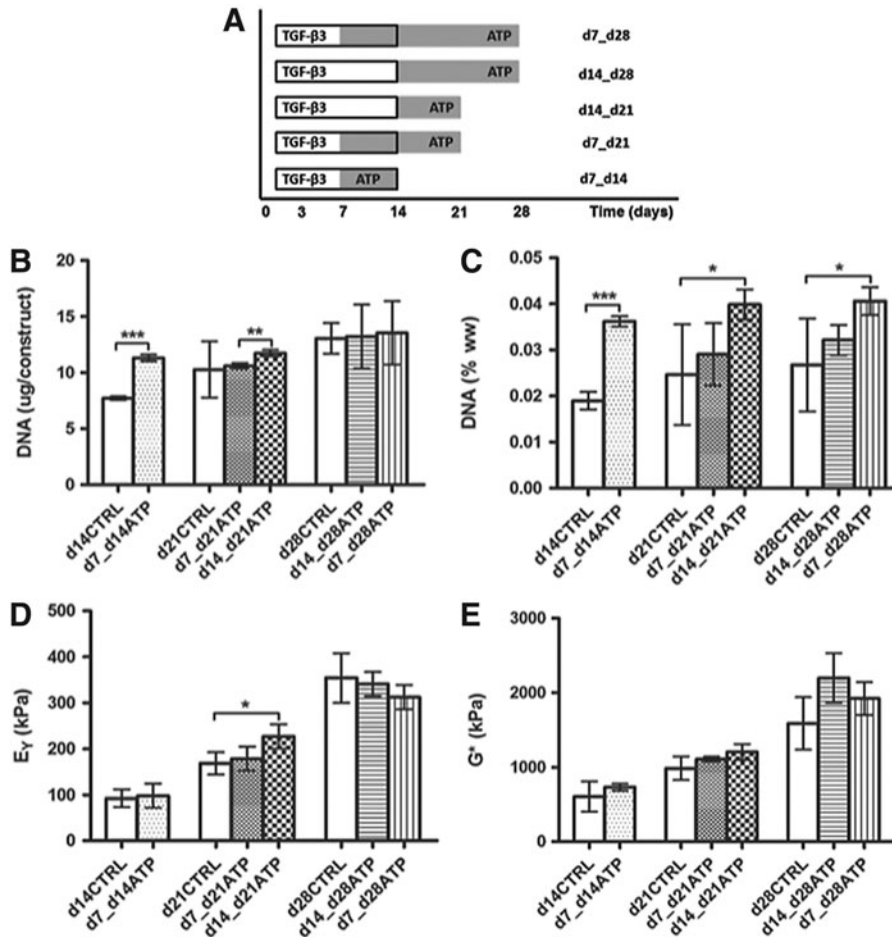

**SUPPLEMENTARY FIG. S1.** Effects of the time for initiation of adenosine 5'-triphosphate (ATP) stimulation on cellularity and mechanical properties of cartilaginous constructs. **(A)** Experimental design of the preliminary studies with different starting points and durations for transient ATP treatment. Duration of transforming growth factor (TGF)-β3 application is also indicated. **(B)** Total DNA content, **(C)** DNA content normalized to wet weight. **(D)** Young's modulus and **(E)** dynamic modulus ( $G^*$ ) of agarose hydrogels seeded with chondrocytes (CHs). Data represent the mean  $\pm$ SD of six CH constructs from one of the two replicate studies. \* $p < 0.05$ , \*\* $p < 0.01$ , \*\*\* $p < 0.001$ .
